# Supplementary material for: COVID-19 Symptoms and Duration of Rapid Antigen Test Positivity at a Community Testing and Surveillance Site During Pre-Delta, Delta, and Omicron BA.1 Periods
Source: PubMed Central journal article supplement (PMC9552893; doi:10.1001/jamanetworkopen.2022.35844), 2022-10-10

## Supplementary Online Content

Marquez C, Kerkhoff AD, Schrom J, et al. COVID-19 symptoms and duration of rapid antigen test positivity at a community testing and surveillance site during pre-Delta, Delta, and Omicron BA.1 periods. *JAMA Netw Open*. 2022;5(10):e2235844.

doi:10.1001/jamanetworkopen.2022.35844

**eTable 1.** Demographics of Symptomatic People Seeking Testing From January 2020-January 2021, by Variant Period

**eTable 2.** Proportion of BinaxNOW Positive Symptomatic Participants Reporting Only One of the Following Symptoms at the Time of Testing During the Omicron Period (December 1, 2021-January 30, 2022)

**eFigure 1.** Prevalence of Selected Symptoms Among Symptomatic People Testing Positive and Negative With the BinaxNOW Rapid Antigen Test During Pre-Delta (January 10-May 31, 2021), Delta (June 1, 2021-November 30, 2021), and the Omicron BA.1 (December 1, 2021-January 30, 2021) Periods

**eFigure 2.** BinaxNOW Positivity Among 942 Repeat Testers With COVID-19 During the Omicron BA.1 Period by Day of Symptom Onset (if Symptomatic) or Day Since Initial Positive Test (if Asymptomatic)

This supplementary material has been provided by the authors to give readers additional information about their work.

**eTable 1: Demographics of symptomatic people seeking testing from January 2020-January 2021, by variant-period.**

|                                     | <b>Overall<br/>(N=18,301)</b> | <b>Pre-Delta<br/>(N=5,533)</b> | <b>Delta<br/>(N=5,485)</b> | <b>Omicron<br/>(N=7,283)</b> | <b>P-value</b> |
|-------------------------------------|-------------------------------|--------------------------------|----------------------------|------------------------------|----------------|
| <b>Age Category (years)</b>         |                               |                                |                            |                              |                |
| <5                                  | 684 (3.7)                     | 113 (2.0)                      | 285 (5.2)                  | 286 (3.9)                    | <0.001         |
| 5-11.9                              | 1510 (8.3)                    | 169 (3.1)                      | 787 (14.4)                 | 554 (7.6)                    |                |
| 12-17.9                             | 1343 (7.3)                    | 274 (5.0)                      | 405 (7.4)                  | 664 (9.1)                    |                |
| 18-30                               | 4985 (27.2)                   | 1725 (31.2)                    | 1385 (25.3)                | 1875 (25.7)                  |                |
| 31-50                               | 7020 (38.4)                   | 2323 (42.0)                    | 1909 (34.8)                | 2788 (28.3)                  |                |
| 51-64                               | 2215 (12.1)                   | 735 (13.3)                     | 570 (10.4)                 | 910 (12.5)                   |                |
| 65 and older                        | 544 (3.0)                     | 194 (3.5)                      | 144 (2.6)                  | 206 (2.8)                    |                |
| <b>Gender<sup>a</sup></b>           |                               |                                |                            |                              |                |
| Male                                | 8513 (46.9)                   | 2643 (47.8)                    | 2517 (46.4)                | 3353 (46.5)                  | <0.001         |
| Female                              | 9394 (51.7)                   | 2761 (49.9)                    | 2830 (52.2)                | 3803 (52.7)                  |                |
| Non-binary                          | 234 (1.3)                     | 106 (1.9)                      | 73 (1.4)                   | 55 (0.8)                     |                |
| Prefer not to say                   | 27 (0.2)                      | 23 (0.4)                       | 4 (0.1)                    | 0                            |                |
| <b>Ethnicity<sup>b</sup></b>        |                               |                                |                            |                              |                |
| Asian                               | 1032 (6.1)                    | 269 (6.1)                      | 402 (7.5)                  | 361 (5.0)                    | <0.001         |
| Black/African American              | 356 (2.1)                     | 145 (3.3)                      | 112 (2.1)                  | 99 (1.4)                     |                |
| Latinx/Hispanic                     | 11856 (69.7)                  | 3120 (70.2)                    | 3408 (63.3)                | 5328 (74.2)                  |                |
| White/Caucasian                     | 2157 (12.7)                   | 618 (13.9)                     | 926 (17.2)                 | 613 (8.5)                    |                |
| Other                               | 1606 (9.5)                    | 295 (6.6)                      | 536 (10.0)                 | 775 (10.8)                   |                |
| <b>Vaccine Status<sup>c</sup></b>   |                               |                                |                            |                              | <0.001         |
| Not Vaccinated                      | 6602 (45.2)                   | 5203 (94.0)                    | 1166 (51.1)                | 233 (3.4)                    |                |
| Partially Vaccinated                | 2265 (15.5)                   | 322 (5.8)                      | 590 (25.8)                 | 1353 (20.0)                  |                |
| Primary Vaccine Series              | 4256 (29.2)                   | 8 (0.1)                        | 431 (18.9)                 | 3817 (56.3)                  |                |
| Primary Vaccine Series with Booster | 1470 (10.1)                   | -- <sup>d</sup>                | 96 (4.2)                   | 1374 (20.2)                  |                |

<sup>a</sup>133 missing responses <sup>b</sup>1294 missing responses <sup>c</sup>3708 missing responses <sup>d</sup>Booster shots were not available at any point during this period <sup>e</sup>1657 missing responses

**eTable 2. Proportion of BinaxNOW Positive Symptomatic Participants Reporting Only One of the following Symptoms at the Time of Testing During the Omicron Period (December 1, 2021-January 30, 2022)**

| Symptom Type                                      | Overall<br>(N=3032) | Age ≥18<br>(N=2419) | Age 12-17<br>(N=311) | Age <12<br>(N=302) | P-value |
|---------------------------------------------------|---------------------|---------------------|----------------------|--------------------|---------|
| Fever                                             | 74 (2.4)            | 45 (1.9)            | 3 (1.0)              | 26 (8.6)           | <0.001  |
| Cough                                             | 477 (15.7)          | 346 (14.3)          | 48 (15.4)            | 83 (27.5)          | 0.030   |
| Shortness of breath                               | 4 (0.1)             | 4 (0.2)             | 0                    | 0                  | 1       |
| Fatigue                                           | 12 (0.4)            | 10 (0.4)            | 0                    | 2 (0.7)            | 0.41    |
| Myalgia                                           | 25 (0.8)            | 22 (0.9)            | 2 (0.6)              | 1 (0.3)            | 0.76    |
| Headache                                          | 51 (1.7)            | 37 (1.5)            | 11 (3.5)             | 3 (1.0)            | 0.036   |
| Loss of taste/smell                               | 5 (0.2)             | 4 (0.2)             | 1 (0.3)              | 0                  | 0.68    |
| Sore throat                                       | 168 (5.5)           | 147 (6.1)           | 17 (5.5)             | 4 (1.3)            | 0.001   |
| Congestion                                        | 140 (4.6)           | 100 (4.1)           | 17 (5.5)             | 23 (7.6)           | 0.019   |
| Nausea                                            | 4 (0.1)             | 3 (0.1)             | 0                    | 1 (0.3)            | 0.39    |
| Diarrhea                                          | 2 (0.1)             | 1 (0.0)             | 0                    | 1 (0.3)            | 0.20    |
| <b>Any of the above symptoms<br/>in isolation</b> | 962 (31.7)          | 719 (29.7)          | 99 (31.8)            | 144 (47.7)         | <0.001  |

eFigure 1. Prevalence of Selected Symptoms Among Symptomatic People Testing Positive and Negative With the BinaxNOW Rapid Antigen Test During Pre-Delta (January 10-May 31, 2021), Delta (June 1, 2021-November 30, 2021), and the Omicron BA.1 (December 1, 2021-January 30, 2021) Periods

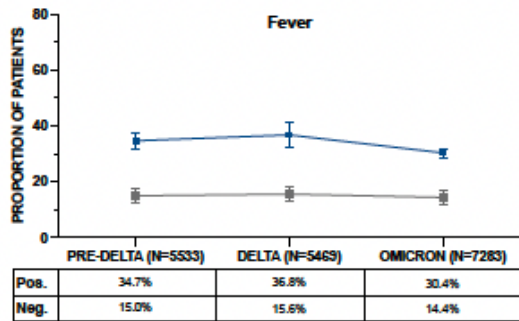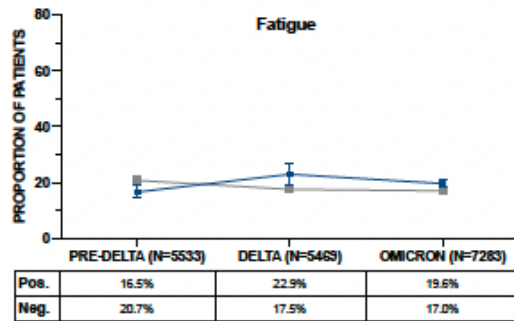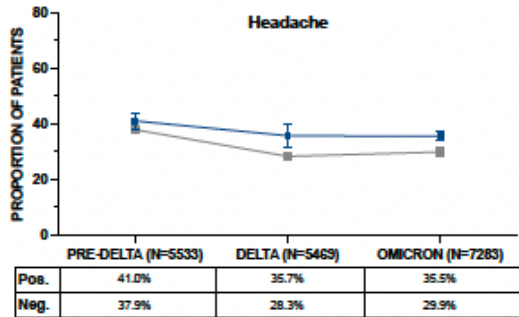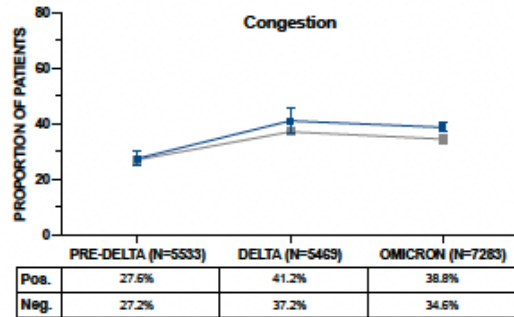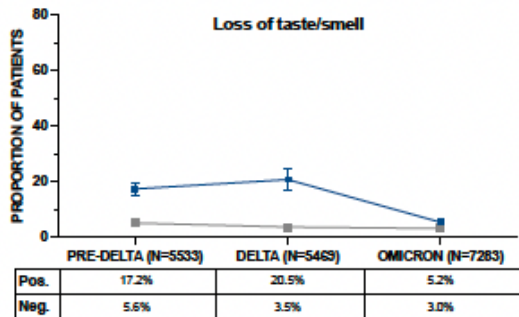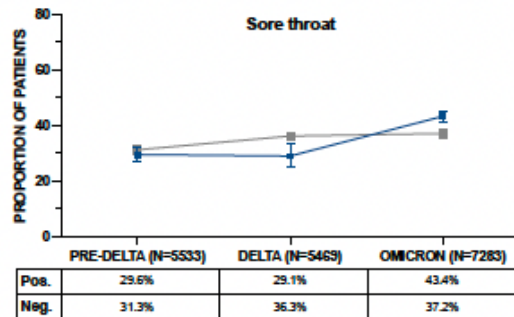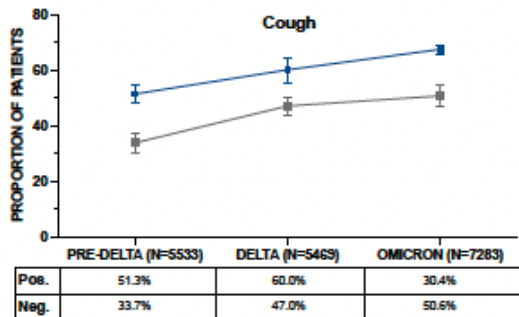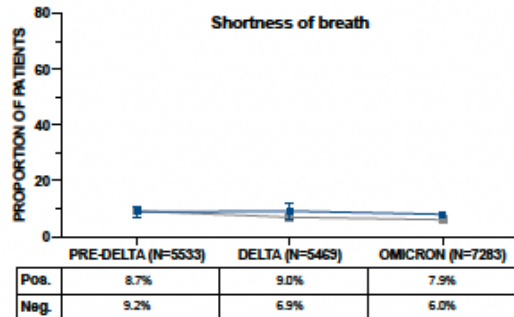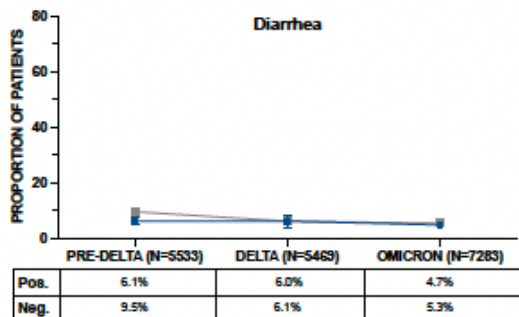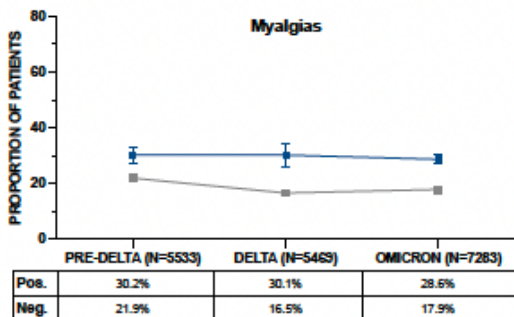

**eFigure 2. BinaxNOW Positivity Among 942 Repeat Testers With COVID-19 During the Omicron BA.1 Period by Day of Symptom Onset (if Symptomatic) or Day Since Initial Positive Test (if Asymptomatic)**

A. Overall, includes symptomatic people and asymptomatic people. B. Stratified by symptom status. Symptomatic include people who report symptoms at the time of their initial positive test and who note a symptom onset date and asymptomatic people include people who do not report symptoms at the time of testing. C. Stratified by self-reported vaccination status.

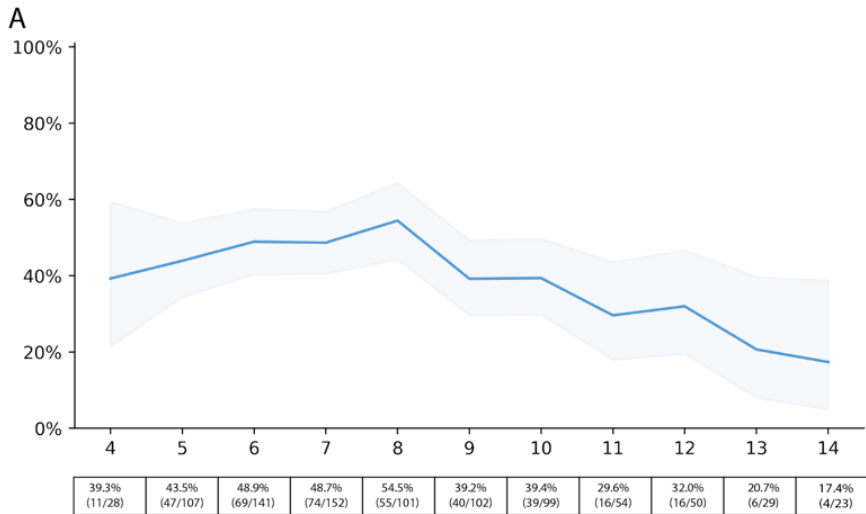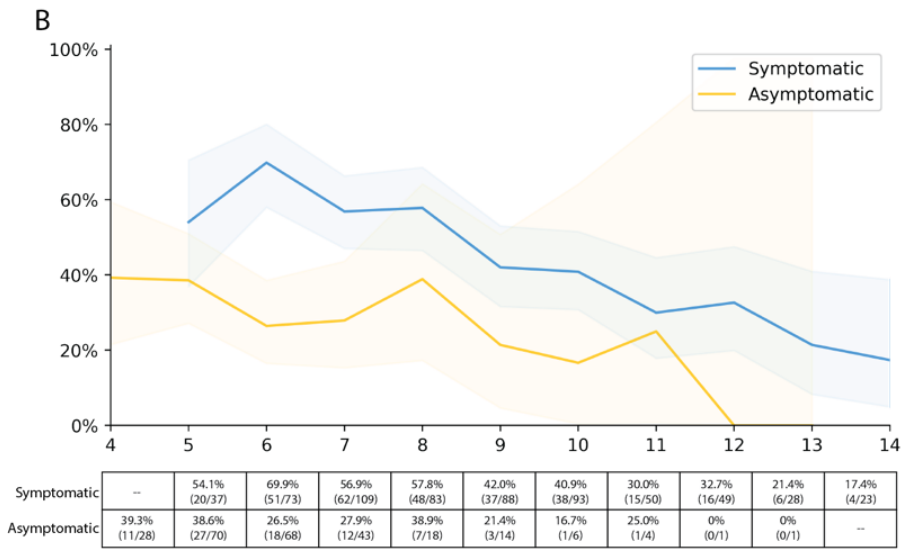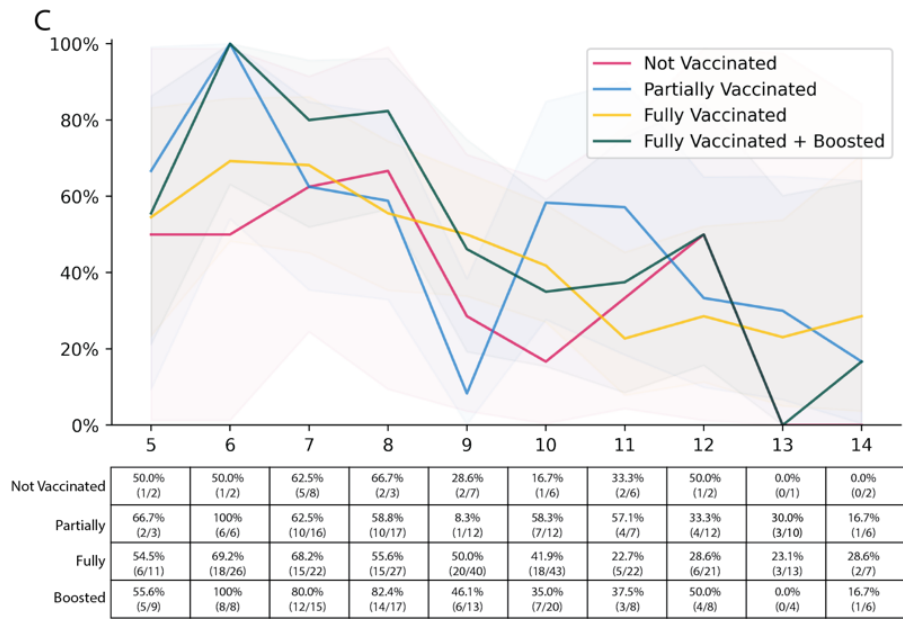

Supplement: jamanetwopen-e2235844-s001.pdf [file jamanetwopen-e2235844-s001.pdf]
